# Supplementary material
Source: publisher figshare collection journal article supplement (https://geolsoc.figshare.com/articles/dataset/_/3454211)
Supplement: Supplementary file 1 [file 1]

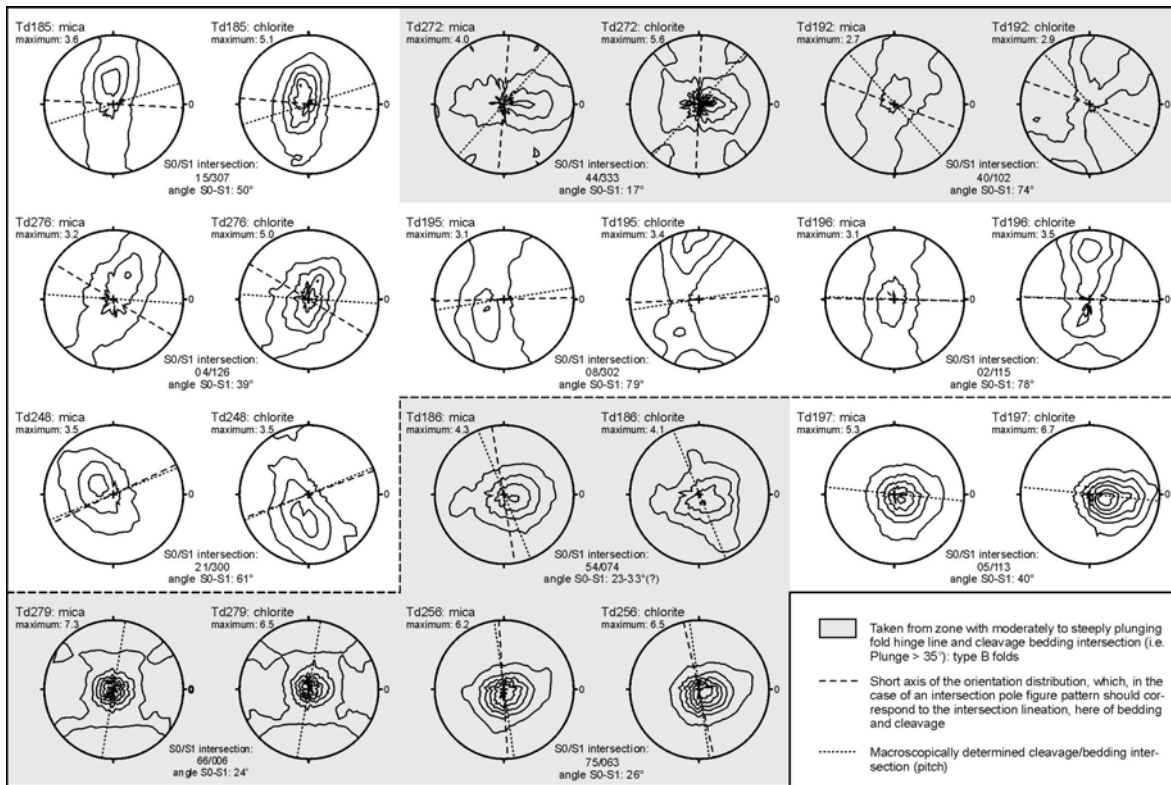

Mica (001) and chlorite (002) pole figure patterns (lower hemisphere equal-area projections) of 11 samples from outcrop N.A.S. 2. The centre of the pole figure approximately coincides with the cleavage pole, except for samples TD185 and TD276, for which the centre of the pole figure approximately coincides with the bedding pole. For each pole figure, the macroscopically determined cleavage/bedding intersection is shown, and, if possible, also the orientation distribution short axis. Two types of pole figure patterns can be distinguished. Type 1 (Asquepont Member), in the upper part of the figure, is characterised by a weak phyllosilicate preferred orientation and by girdle patterns to orthorhombic symmetries, reflecting intersection fabrics. Type 2 (Asquepont Member and Ripain Member), in the lower part of the figure, is characterised by a weak to moderate preferred orientation and axially symmetrical to only slightly orthorhombic pole figure patterns. These reflect flattening fabrics. See table 3 for sample location.
